# Supplementary material for: Paediatric Intestinal Enteroids Derived from Very Early Onset Inflammatory Bowel Disease Reveal Differences in Growth, Morphology, and Barrier Function
Source: Research Square preprint supplement (doi:10.21203/rs.3.rs-8034357/v1), 2025-11-14
Supplement: Supplementary file 1 [file efd37705802d9f283dcce232.docx]

**Derivation of Human Intestinal Enteroids (HIEs) from intestinal biopsies**

Fresh intestinal biopsies were processed within 4–5 hours of collection. The samples were collected in a 50mL tube and rinsed twice with cold Complete Media without Growth Factor(CMGF-)/1X Phosphate Buffered Saline (PBS) containing 50 µL of penicillin/streptomycin. Samples were transferred to a 10 cm Petri dish and cut into small pieces using a sterile scalpel within cold CMGF- medium. The contents were transferred to a 15mL tube and washed with 5mL of complete chelating solution (CCS) 8-10 times. The supernatant was removed, and the sample was transferred to a fresh 15mL tube. The wash step was repeated with CCS five times, using a fresh 15mL tube each time, until the supernatant became clear. The samples were transferred to a 10 cm petri dish, and 5mL of CCS with 200 µL of 20 mM Ethylene Diamine Tetra Acetic acid (EDTA) was added. The cells were incubated at 4°C on a mini-shaker for 30-60 minutes. When crypts dissociate, holes appear in the tissue. Samples were examined under a microscope after 20-30 minutes for the absence of crypts. The samples and supernatant were transferred to a 15mL tube and rinsed with 5mL of CCS containing 50 µL penicillin/streptomycin and 50 µl fungizone 8-10 times. The mixture was then vortexed for 15-30s. Then, 2mL of Fetal Bovine Serum (FBS) was added, and the tubes were kept on ice. The supernatant containing crypt cells was transferred to a 15mL tube. The tubes were centrifuged at 200 x g at 4°C for 5 min. The supernatant was removed, and the pellet was resuspended in 5mL of cold CMGF- with 50 µL fungizone. The pellet was emulsified by pipetting 8-10 times and centrifuged at 100xg at 4°C for 5 min. The supernatant was removed, and the pellet was resuspended in thawed Matrigel. 30 µL Matrigel was used per well; small biopsy samples were mixed to yield up to 10 wells. The 30 µL Matrigel sample was suspended without bubbles in each chamber of a 24-well plate. The plate was maintained at room temperature for 1-2 minutes and incubated at 37°C for 15min. Next, 500 µL of complete media with growth factor(CMGF+) was added to each well. The plates were incubated at 37°C in a 5% CO2 incubator. Wells were checked daily for budding crypts under a microscope. The medium was replaced with 500 µL of CMGF+ every alternate day. On day 7, 3D HIEs were passaged.

**Adapated from**

- Mahe MM, Aihara E, Schumacher MA, Zavros Y, Montrose MH, Helmrath MA, Sato T, Shroyer NF. Establishment of gastrointestinal epithelial organoids. Current protocols in mouse biology. 2013 Dec 1;3(4):217-40.
- Zou WY, Blutt SE, Crawford SE, Ettayebi K, Zeng XL, Saxena K, Ramani S, Karandikar UC, Zachos NC, Estes MK. Human intestinal enteroids: new models to study gastrointestinal virus infections. Methods Mol Bio. 2017 Mar 31;1-19

**HIE monolayers grown in transwells**

For collagen coating, 100 μL of a 1:30 dilution of Collagen IV stock in cold H₂O was added to each well of a 96-well plate or the upper compartment of a Transwell insert (Corning 3470, USA), placed in a 24-well plate, and incubated at 37 °C for 1.5 h. For seeding, one well of HIEs (≥50 HIEs/well) cultured for 7 days in CMGF+ medium was collected by washing with 500 μL of 0.5 mM EDTA (prepared by diluting 0.5 M EDTA in PBS 1:1000), followed by centrifugation at 300 × g for 5 min at 4°C. The pellet was resuspended in 500 μL of 0.05% trypsin and incubated at 37°C for 4 min before inactivation with 1 mL CMGF medium containing 10% FBS. Enteroids were dissociated into a single cell suspension by pipetting ~50 times with a P1000 pipettor, avoiding bubble formation. A 40 μm cell strainer was pre-wetted with 1 mL of CMGF- with 10% FBS and placed on a 50 mL tube; dissociated cells were passed through by gravity, and the flow-through was centrifuged at 400 x g for 5 min at room temperature. Water was removed from the upper chamber of the Transwells, and the pellet was resuspended in 100 μL of CMGF+ containing 10 μM Y-27632 and seeded into the upper chamber. For the Transwell assay, 600 μL of CMGF+ with 10 μM Y-27632 was added to the lower chamber. After 24 h, the medium in both upper and lower chambers was replaced with differentiation medium.

**Freezing of HIEs**

HIEs cultured for 6–7 days were harvested by disrupting Matrigel with cold CMGF⁻ and repeated pipetting. The suspension was centrifuged at 800 x g for 5 minutes at 4 °C, and the pellet was resuspended in Freezing medium (Gibco, USA) (500 µL per vial, two wells per vial Cryovial). Cryovials were frozen at –70 °C overnight and then transferred to liquid nitrogen for long-term storage.

HIEs were revived from cryopreserved stocks by partial thawing at room temperature and dilution in cold CMGF⁻ medium, followed by centrifugation at 800 x g for 5 min at 4 °C. Pellets were resuspended in Matrigel (30 µL/well), plated into pre-warmed 24-well plates, incubated at 37 °C for 20 min, and overlaid with 500 µL of CMGF + medium containing Y-27632. Cultures were maintained at 37 °C in 7% CO₂, with medium changes every other day, and monitored daily for enteroid development. HIEs were passaged every 6–7 days by disrupting Matrigel in cold CMGF⁻, followed by centrifugation, mechanical shearing with a 31G insulin syringe, and reseeding in fresh Matrigel at a 1:3–1:4 split ratio. After 4 days in CMGF +, cultures were transitioned to differentiation medium and refreshed every other day.

**Preparation of Complete Chelating Solution (CCS)**

The Complete Chelating Solution (CCS) was prepared by initially formulating a 5X Incomplete Chelating Solution (ICS). To prepare the 5X ICS, 2.7 g of KH2PO4, 2.49 g of Na2HPO4.2H2O, 14 g of NaCl, 0.3 g of KCl, 37.5 g of sucrose, and 25 g of D-sorbitol were accurately weighed and suspended in 100mL of Milli-Q water. The mixture was dissolved completely using a magnetic stirrer and diluted to a final volume of 500mL. The solution was filtered through a 0.2 µm membrane filter and stored in a sterile plastic bottle at 2-8°C for a maximum of two years. Then, 5 g of DTT was weighed and dissolved in 32mL of Milli-Q water. This solution was aliquoted into 60 µl portions in 2mL storage vials and stored at -20°C for up to two years. The CCS was prepared by combining 100mL of 5X ICS with 400mL of Milli-Q water, aliquoted into 50mL tubes, and stored at room temperature. Dithiothreitol (DTT) was added only when necessary; 26 µl of DTT was added to each 50mL tube to obtain the final CCS.

**Table 1: Human Intestinal Enteroid Media**

| **Reagent** | **Catalog number** | **Stock concentration** | **Final concentration** | **Amount to add for 50ml** |
| --- | --- | --- | --- | --- |
| CMGF- | 12634-010 (Invitrogen) |  |  | 38.15ml |
| Wnt-3A fusion protein | N001-0.1mg (Immunoprecise) | 5μm | 0.2nM | 2µl |
| B27 supplement | 17504-044 (Invitrogen) | 50x |  | 1ml |
| N-Acetylcysteine | A9165-5G (Sigma) | 500mM | 1.25mM | 125µl |
| R-Spondin Conditioned media* (with FBS) | In house |  |  | 10ml |
| Noggin recombinant. protein | 250-38 (Preprotech) | 100ug/ml | 100ng/ml | 50µl |
| Epidermal Growth Factor (EGF) | PMG8043 (Gibco) | 50ug/ml | 50ng/ml | 50µl |
| Nicotinamide | N0636 (Sigma Aldrich) | 1M | 10µM | 500µl |
| A83 | 2939 (Tocris) | 0.5mM | 500nM | 50µl |
| SB202190 | S7067(Sigma) | 10mM | 10µM | 50µl |
| Primocin | Ant-pm-05 (Invivogen) | 500x | 100µg/ml | 100µl |

* 293T-HA-Rspol-Fc cell line was provided by the Estes lab, Baylor College of Medicine

**Table 2: Differentiation media**

| **Reagent** | **Catalog number** | **Stock concentration** | **Final concentration** | **Amount to add for 50ml** |
| --- | --- | --- | --- | --- |
| CMGF- | 12634-010 (Invitrogen) |  |  | 8ml |
| R-Spondin Conditioned Media(with FBS)* |  |  |  | 5ml |
| Noggin Conditioned Media* |  |  |  | 2.5ml |
| B27 supplement | 17504-044 (Invitrogen) | 50x |  | 1ml |
| N2 supplement | 17502-048 (Invitrogen) | 100x |  | 0.5ml |
| EGF | PMG8043 (Gibco) | 50µg/ml | 50ng/ml | 50µl |
| Gastrin | G9145(Sigma-Aldrich) | 10µm | 10nM | 50µl |
| A83 | 2939(Tocris) | 0.5mM | 500nM | 50µl |
| N-Acetylcysteine | A9165-5G(Sigma) | 500mM | 1mM | 100µl |

* 293T-HA-Rspol-Fc and 293 Noggin cell lines were provided by the Estes lab, Baylor College of Medicine

**Tabl 3 : CMGF- Media (Complete media without growth factors)**

| **Reagent** | **Catalog number** | **Amount to add for 50ml** |
| --- | --- | --- |
| Advanced DMEM/F12 | 12634-010(Gibco) | 48.5ml |
| Glutamax | 35050-061(Gibco) | 500µl |
| 4-(2-hydroxyethyl)-1-piperazineethanesulfonic acid (HEPES ) | 15630-080(Gibco) | 500µl |
| Penicillin/Streptomycin | 15140-122(Gibco) | 500µl |

**Table 4: qPCR Primers**

| **Sl.no** | **Primers** | **Catalog No** |
| --- | --- | --- |
| 1 | GAPDH | Hs02786624-g1(Thermo Scientific) |
| 2 | CHGA | Hs00900370-m1(Thermo Scientific) |
| 3 | TLR4 | Hs00152939-m1(Thermo Scientific) |
| 4 | LGR5 | Hs00969422-m1(Thermo Scientific) |
| 5 | LYZ | Hs00426232-m1(Thermo Scientific) |
| 6 | Ki67 | Hs01032443-m1(Thermo Scientific) |
| 7 | SI | Hs00356112-m1(Thermo Scientific) |
| 8 | ZO1 | Hs01551867-m1(Thermo Scientific) |
| 9 | TLR3 | Hs00152933-m1(Thermo Scientific) |
| 10 | Claudin-1 | Hs00221623-m1(Thermo Scientific) |
| 11 | IFN- β | Hs01077958-m1(Thermo Scientific) |
| 12 | MUC2 | Hs03005892_m1( Thermo Scientific) |
|  |  |  |

**Table:5 Antibodies**

| **S.no** | **Name** | **Cat. No** | **Dilution** |
| --- | --- | --- | --- |
| 1 | DAPI (4',6-diamidino-2-phenylindole ) | D1306 (Invitrogen, USA) | 1:1000 |
| 2 | Anti-Mouse Sucrase-Isomaltase | SC-393424 (Santa Cruz Biotech, USA) | 1:50 |
| 3 | Anti-Rabbit Chromogranin A | NBP2-12470 (Novus,USA) | 1:100 |
| 4 | Anti-Rabbit Lysozyme | A0099 (Dako, Denmark) | 1:100 |
| 9 | Anti-Mouse Mucin 2 | SC-515032 (Santa Cruz Biotech, USA) | 1:100 |
| 5 | Anti-Mouse IgG (488) | 610-741-124 ( I Rockland, USA) | 1:1000 |
| 6 | Anti-Mouse IgG (649) | 610-743-124 (I Rockland, USA) | 1:1000 |
| 7 | Anti-Rabbit IgG (649) | 611-743-127 (I Rockland, USA) | 1:1000 |
